# Supplementary material
Source: publisher site journal article supplement (https://www.spandidos-publications.com/1295/downloadSupplementary)
Supplement: Supplementary file 1 [file downloadSupplementary]

## Sheet: Supplementary_Data4
Table SIV. MiRNAs both bound to TREENA1 and Snail.
TRERNA1	SNAI1	TRERNA1|SNAI1
hsa-miR-4682	hsa-miR-6775-5p	hsa-miR-1226-5p
hsa-miR-661	hsa-miR-6803-5p	hsa-miR-23a-5p
hsa-miR-1296-5p	hsa-miR-6771-5p	hsa-miR-1343-5p
hsa-miR-760	hsa-miR-6089	hsa-miR-6724-5p
hsa-miR-6789-5p	hsa-miR-6798-5p	hsa-miR-6787-5p
hsa-miR-3943	hsa-miR-6791-5p	hsa-miR-4685-5p
hsa-miR-1538	hsa-miR-328-5p	hsa-miR-1207-5p
hsa-miR-10398-5p	hsa-miR-6796-5p	hsa-miR-638
hsa-miR-6735-3p	hsa-miR-6782-5p	hsa-miR-1229-5p
	hsa-miR-4649-5p	hsa-miR-4449
	hsa-miR-6848-5p	hsa-miR-6861-5p
	hsa-miR-3138	hsa-miR-637
	hsa-miR-6751-5p	hsa-miR-4722-5p
	hsa-miR-6756-5p	hsa-miR-6813-5p
	hsa-miR-6765-5p	hsa-miR-6819-5p
	hsa-miR-623	hsa-miR-185-3p
	hsa-miR-1182	hsa-miR-4763-3p
	hsa-miR-3940-5p	hsa-miR-615-5p
	hsa-miR-6752-5p	hsa-miR-8089
	hsa-miR-6749-5p	hsa-miR-6501-5p
	hsa-miR-4695-5p
	hsa-miR-370-3p
	hsa-miR-939-5p
	hsa-miR-30b-3p
	hsa-miR-7114-5p
	hsa-miR-6774-5p
	hsa-miR-1228-5p
	hsa-miR-6741-5p
	hsa-miR-3191-3p
	hsa-miR-4640-5p
	hsa-miR-6764-5p
	hsa-miR-4707-5p
	hsa-miR-6736-5p
	hsa-miR-6726-5p
	hsa-miR-6871-5p
	hsa-miR-4446-3p
	hsa-miR-3190-3p
	hsa-miR-10398-3p
	hsa-miR-6846-5p
	hsa-miR-769-3p
	hsa-miR-194-3p
	hsa-miR-4656
	hsa-miR-6779-5p
	hsa-miR-3619-5p
	hsa-miR-608
	hsa-miR-5090
	hsa-miR-6721-5p
	hsa-miR-6802-5p
	hsa-miR-4726-5p
	hsa-miR-5008-5p
	hsa-miR-6727-5p
	hsa-miR-6855-5p
	hsa-miR-4691-5p
	hsa-miR-6858-5p
	hsa-miR-7110-5p
	hsa-miR-3620-5p
	hsa-miR-1183
	hsa-miR-6777-5p
	hsa-miR-5787
	hsa-miR-5705
	hsa-miR-6883-5p
	hsa-miR-6806-5p
	hsa-miR-4518
	hsa-miR-6870-5p
	hsa-miR-1914-3p
	hsa-miR-4741
	hsa-miR-6793-5p
	hsa-miR-365a-5p
	hsa-miR-4281
	hsa-miR-3150a-3p
	hsa-miR-6810-5p
	hsa-miR-762
	hsa-miR-5189-5p
	hsa-miR-4673
	hsa-miR-6857-5p
	hsa-miR-4758-5p
	hsa-miR-5088-5p
	hsa-miR-3189-3p
	hsa-miR-4498
	hsa-miR-6746-5p
	hsa-miR-330-5p
	hsa-miR-937-5p
	hsa-miR-4507
	hsa-miR-6762-3p
	hsa-miR-7843-5p
	hsa-miR-4259
	hsa-miR-10401-5p
	hsa-miR-4734
	hsa-miR-10392-3p
	hsa-miR-3192-5p
	hsa-miR-4783-3p
	hsa-miR-4674
	hsa-miR-8069
	hsa-miR-12115
	hsa-miR-4749-5p
	hsa-miR-6769b-5p
	hsa-miR-4265
	hsa-miR-3127-3p
	hsa-miR-6785-5p
	hsa-miR-12128
	hsa-miR-6735-5p
	hsa-miR-1294
	hsa-miR-6790-5p
	hsa-miR-6763-5p
	hsa-miR-1225-5p
	hsa-miR-12119
	hsa-miR-671-5p
	hsa-miR-4651
	hsa-miR-3137
	hsa-miR-6775-3p
	hsa-miR-4713-3p
	hsa-miR-3972
	hsa-miR-30c-1-3p
	hsa-miR-3689a-3p
	hsa-miR-6127
	hsa-miR-6890-5p
	hsa-miR-4322
	hsa-miR-365b-5p
	hsa-miR-1587
	hsa-miR-6767-5p
	hsa-miR-6893-5p
	hsa-miR-4750-5p
	hsa-miR-657
	hsa-miR-6085
	hsa-miR-6842-5p
	hsa-miR-6754-5p
	hsa-miR-431-3p
	hsa-miR-6511a-5p
	hsa-miR-4525
	hsa-miR-3198
	hsa-miR-3193
	hsa-miR-6773-5p
	hsa-miR-5006-5p
	hsa-miR-3944-3p
	hsa-miR-8085
	hsa-miR-6786-5p
	hsa-miR-197-5p
	hsa-miR-3180-3p
	hsa-miR-6882-3p
	hsa-miR-6836-5p
	hsa-miR-6766-5p
	hsa-miR-296-3p
	hsa-miR-6753-5p
	hsa-miR-5187-5p
	hsa-miR-23b-5p
	hsa-miR-1469
	hsa-miR-6770-3p
	hsa-miR-4433a-3p
	hsa-miR-3622b-5p
	hsa-miR-7107-3p
	hsa-miR-10400-3p
	hsa-miR-4472
	hsa-miR-4725-3p
	hsa-miR-6722-3p
	hsa-miR-6827-5p
	hsa-miR-5589-5p
	hsa-miR-6805-5p
	hsa-miR-4739
	hsa-miR-6746-3p
	hsa-miR-3909
	hsa-miR-1270
	hsa-miR-3934-5p
	hsa-miR-4690-3p
	hsa-miR-4665-5p
	hsa-miR-512-3p
	hsa-miR-1231
	hsa-miR-6876-3p
	hsa-miR-6720-5p
	hsa-miR-6824-5p
	hsa-miR-6876-5p
	hsa-miR-3189-5p
	hsa-miR-3616-3p
	hsa-miR-7974
	hsa-miR-4657
	hsa-miR-11181-3p
	hsa-miR-1293
	hsa-miR-6865-5p
	hsa-miR-7111-5p
	hsa-miR-662
	hsa-miR-6780a-5p
	hsa-miR-6728-5p
	hsa-miR-7109-5p
	hsa-miR-6799-5p
	hsa-miR-3661
	hsa-miR-6825-5p
	hsa-miR-432-5p
	hsa-miR-612
	hsa-miR-6716-5p
	hsa-miR-7106-5p
	hsa-miR-324-5p
	hsa-miR-4469
	hsa-miR-6860
	hsa-miR-4700-5p
	hsa-miR-6759-5p
	hsa-miR-1292-5p
	hsa-miR-423-3p
	hsa-miR-3937
	hsa-miR-1268b
	hsa-miR-3183
	hsa-miR-6743-3p
	hsa-miR-7150
miRNA/miR, microRNA; TRERNA1, translation regulatory long non‑coding RNA 1.
